# Supplementary material for: A Pyrazolo[3,4-d]pyrimidine compound inhibits Fyn phosphorylation and induces apoptosis in natural killer cell leukemia
Source: PubMed Central journal article supplement (PMC5323146; doi:10.18632/oncotarget.11496), 2016-08-22
Supplement: oncotarget-07-65171-s001.pdf [file oncotarget-07-65171-s001.pdf]

## A Pyrazolo[3,4-*d*]pyrimidine compound inhibits Fyn phosphorylation and induces apoptosis in natural killer cell Leukemia

### Supplementary Materials

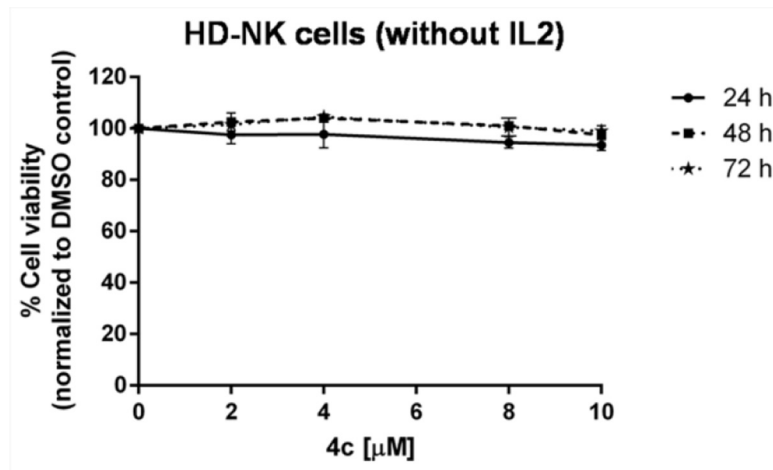

Supplementary Figure S1: Viability of 3 samples of NK primary cells sorted from HDs (HD-NK cells) cultured without IL2 was evaluated by MTS assay after treatment with 4c compound at different concentration (2–10  $\mu\text{M}$ ) for 24–72 hours. Results are expressed as percent of cell viability normalized to DMSO-treated control cells. The bar-graphs represent mean with S.D. from three independent experiments.

**Supplementary Table S1: First cluster up-regulated genes resulting by DAVID bioinformatic tool in GEP analysis of KHYG1 treated with 4c compound or with DMSO control**

| Term                                                    | Count | P-value  | Genes                                                                                                                                                                                   |
|---------------------------------------------------------|-------|----------|-----------------------------------------------------------------------------------------------------------------------------------------------------------------------------------------|
| GO:0042981~regulation of apoptosis                      | 27    | 1.08E-04 | TXNIP, CFLAR, GIMAP5, TM2D1, DFFA, RXRA, ITGA1, FASLG, RPS27L, IFI16, BCL2L13, STK4, SELS, ATM, TXNDC12, CDKN1A, FNTA, BTG1, SH3GLB1, BCL2, DAD1, CSTB, FAIM3, GLO1, CFDP1, MYC, PHLDA1 |
| GO:0043067~regulation of programmed cell death          | 27    | 1.26E-04 | TXNIP, CFLAR, GIMAP5, TM2D1, DFFA, RXRA, ITGA1, FASLG, RPS27L, IFI16, BCL2L13, STK4, SELS, ATM, TXNDC12, CDKN1A, FNTA, BTG1, SH3GLB1, BCL2, DAD1, CSTB, FAIM3, GLO1, CFDP1, MYC, PHLDA1 |
| GO:0010941~regulation of cell death                     | 27    | 1.34E-04 | TXNIP, CFLAR, GIMAP5, TM2D1, DFFA, RXRA, ITGA1, FASLG, RPS27L, IFI16, BCL2L13, STK4, SELS, ATM, TXNDC12, CDKN1A, FNTA, BTG1, SH3GLB1, BCL2, DAD1, CSTB, FAIM3, GLO1, CFDP1, MYC, PHLDA1 |
| GO:0043065~positive regulation of apoptosis             | 18    | 1.85E-04 | TXNIP, CFLAR, TM2D1, DFFA, RXRA, ITGA1, FASLG, RPS27L, IFI16, BCL2L13, STK4, ATM, TXNDC12, CDKN1A, SH3GLB1, BCL2, MYC, PHLDA1                                                           |
| GO:0043068~positive regulation of programmed cell death | 18    | 2.01E-04 | TXNIP, CFLAR, TM2D1, DFFA, RXRA, ITGA1, FASLG, RPS27L, IFI16, BCL2L13, STK4, ATM, TXNDC12, CDKN1A, SH3GLB1, BCL2, MYC, PHLDA1                                                           |
| GO:0010942~positive regulation of cell death            | 18    | 2.13E-04 | TXNIP, CFLAR, TM2D1, DFFA, RXRA, ITGA1, FASLG, RPS27L, IFI16, BCL2L13, STK4, ATM, TXNDC12, CDKN1A, SH3GLB1, BCL2, MYC, PHLDA1                                                           |
| Apoptosis                                               | 16    | 4.95E-04 | CFLAR, LITAF, TM2D1, DFFA, GZMA, TNFRSF12A, FASLG, BCL2L13, STK4, ATM, TXNDC12, SH3GLB1, BCL2, DAD1, SRGN, PHLDA1                                                                       |

**Supplementary Table S2: First cluster down-regulated genes resulting by DAVID bioinformatic tool in GEP analysis of KHYG1 treated with 4c compound or with DMSO control. See Supplementary\_ Table\_S2.**
